# Supplementary material for: Evaluation of Graphene Oxide Induced Cellular Toxicity and Transcriptome Analysis in Human Embryonic Kidney Cells
Source: PubMed Central journal article supplement (PMC6669460; doi:10.3390/nano9070969), 2019-07-02
Supplement: nanomaterials-09-00969-s001.pdf [file nanomaterials-09-00969-s001.pdf]

Supplementary Table S1. HEK293-Treatment-Up-Regulated-Genes.

| Symbol         | FPKM<br>(Control1) | FPKM<br>(Control2) | FPKM<br>(Treatment1) | FPKM<br>(Treatment2) | Log2FC   |
|----------------|--------------------|--------------------|----------------------|----------------------|----------|
| ABHD11-AS1     | 0                  | 0                  | 4.45561              | 3.9924               | 5.434296 |
| ACRC           | 1.31082            | 1.03398            | 10.7299              | 9.41993              | 2.999393 |
| ACTN2          | 2.44821            | 2.51843            | 8.40331              | 7.5381               | 1.643468 |
| ANKRD30BL      | 415.575            | 413.05             | 9976.04              | 11987.9              | 4.727939 |
| ANXA6          | 31.2692            | 22.3066            | 92.9458              | 106.506              | 1.892457 |
| APC2           | 0.224074           | 0.174551           | 4.99473              | 5.10898              | 4.105368 |
| ARC            | 1.34272            | 1.61215            | 137.544              | 141                  | 6.465216 |
| ASB1           | 6.9858             | 7.45154            | 20.7373              | 26.7161              | 1.702926 |
| ATN1           | 6.55978            | 6.73679            | 24.609               | 29.5317              | 2.00944  |
| BAG3           | 7.90873            | 10.5781            | 41.4866              | 36.9555              | 2.07328  |
| C19orf26       | 1.91453            | 1.92258            | 4.30066              | 8.22943              | 1.656848 |
| C9orf173       | 0.120528           | 0                  | 3.08617              | 8.30289              | 5.176169 |
| CAPN15         | 20.2166            | 13.4925            | 53.4824              | 54.2645              | 1.670577 |
| CCDC86         | 32.7102            | 24.8082            | 86.8066              | 93.1418              | 1.642083 |
| CD68           | 0.948763           | 2.36054            | 10.5745              | 7.7819               | 2.40266  |
| CDKN1C         | 1.82948            | 2.09094            | 14.3732              | 13.914               | 2.789451 |
| CHGA           | 0.91083            | 2.12501            | 7.32445              | 7.00746              | 2.167012 |
| CLU            | 2.95305            | 7.88171            | 29.4788              | 24.8029              | 2.303716 |
| CORO7-PAM16    | 7.74E-06           | 0.94293            | 3.3485               | 5.27124              | 2.947989 |
| CRYAB          | 0.137821           | 0.160316           | 14.1008              | 15.8047              | 5.917341 |
| CSRNP1         | 3.14259            | 6.01844            | 15.1315              | 13.0627              | 1.600857 |
| CTGF           | 1.32456            | 0.801408           | 7.10536              | 6.04271              | 2.520728 |
| DHRS2          | 3.25791            | 1.98184            | 19.7983              | 20.6822              | 2.902725 |
| DIAPH1         | 28.7895            | 27.4294            | 78.7691              | 97.4412              | 1.644684 |
| DIO3           | 0.165558           | 0.386278           | 3.90578              | 3.8217               | 3.398372 |
| DLL1           | 4.85297            | 6.22053            | 29.0893              | 27.5973              | 2.335153 |
| DNAH17         | 0.345726           | 1.30387            | 3.27294              | 3.3989               | 1.893486 |
| DNAJB1         | 19.8567            | 28.334             | 197.99               | 179.19               | 2.963216 |
| DRD4           | 0.895232           | 0.730155           | 3.73397              | 2.74766              | 1.871998 |
| EEF1E1-BLOC1S5 | 1.68833            | 0.00257302         | 0.297226             | 6.62929              | 1.914122 |
| EN2            | 5.78229            | 6.09521            | 17.7823              | 19.1028              | 1.618518 |
| EPPK1          | 7.28904            | 8.57976            | 36.9564              | 40.7908              | 2.278235 |
| ETV4           | 0.306192           | 0.353574           | 2.94809              | 4.0747               | 3.07054  |
| ETV5           | 0.54193            | 0.949287           | 4.54286              | 3.65709              | 2.312319 |
| FABP3          | 0.11519            | 0                  | 3.31955              | 3.52803              | 4.482834 |
| FAM222A        | 1.75818            | 0.837764           | 4.73985              | 4.9775               | 1.826619 |
| FOS            | 18.8239            | 14.0151            | 62.6352              | 52.6202              | 1.805094 |
| FOSB           | 5.76209            | 3.10528            | 30.0781              | 33.328               | 2.810409 |
| FOSL1          | 0.269692           | 0.70904            | 9.31293              | 7.07018              | 3.814407 |
| GADD45B        | 10.1838            | 11.247             | 175.885              | 149.159              | 3.910364 |
| GADD45G        | 0.477282           | 1.94427            | 11.8403              | 11.8733              | 3.189338 |
| GLTSCR1        | 1.37719            | 1.49701            | 4.07277              | 6.42125              | 1.798521 |

|             |           |            |         |         |          |
|-------------|-----------|------------|---------|---------|----------|
| HBEGF       | 2.24117   | 2.95626    | 9.87949 | 7.3142  | 1.688219 |
| HIC1        | 0.499483  | 0.624749   | 4.59812 | 5.98357 | 3.025356 |
| HIST1H1T    | 1.34942   | 0.671325   | 4.29492 | 2.93362 | 1.742035 |
| HMOX1       | 21.0341   | 51.8436    | 118.958 | 120.035 | 1.710672 |
| HSPA1A      | 0.330315  | 0.495588   | 71.3934 | 65.7627 | 7.064883 |
| HSPA1B      | 29.3923   | 45.3115    | 358.949 | 332.88  | 3.207722 |
| HSPA2       | 0.984202  | 2.15392    | 4.22632 | 6.31819 | 1.686491 |
| HSPA6       | 0.0974421 | 0.113702   | 372.441 | 312.448 | 10.70243 |
| HSPA7       | 0.0458864 | 0.107098   | 12.1135 | 10.0704 | 5.986713 |
| IGF2-AS     | 0.096541  | 0.264356   | 9.52037 | 6.53797 | 4.8573   |
| IL11        | 0.104772  | 0.281685   | 4.35121 | 3.71699 | 3.817476 |
| INO80B-WBP1 | 0.671944  | 0.00331386 | 15.0271 | 12.8429 | 5.003177 |
| JOSD2       | 5.37202   | 2.17353    | 10.1946 | 14.564  | 1.688097 |
| JUNB        | 6.80299   | 6.57355    | 26.0347 | 24.9072 | 1.91339  |
| KCNC3       | 1.70398   | 0.80992    | 4.47463 | 5.46163 | 1.901086 |
| KDM6B       | 2.88537   | 2.70427    | 10.468  | 13.0238 | 2.032842 |
| KLHL21      | 14.267    | 8.78923    | 46.4031 | 40.0886 | 1.898277 |
| LDLR        | 2.37513   | 1.19805    | 8.80399 | 8.03824 | 2.175261 |
| LFNG        | 0.677681  | 0.856423   | 3.73903 | 2.9645  | 1.993144 |
| LINC00910   | 2.14419   | 2.09805    | 13.5301 | 17.6859 | 2.82214  |
| LOC649352   | 0         | 0.351329   | 22.0537 | 22.9147 | 6.356257 |
| LY6K        | 0         | 0.247363   | 3.05724 | 5.05683 | 4.216037 |
| MAFA        | 0.629056  | 1.41161    | 9.18938 | 12.6664 | 3.299157 |
| MAFA-AS1    | 0         | 0.501067   | 2.71989 | 6.49759 | 3.747717 |
| MAFF        | 0.571213  | 1.02984    | 13.7628 | 10.9905 | 3.792318 |
| MAP3K14     | 1.58015   | 1.32641    | 5.73253 | 6.38021 | 1.986762 |
| MIDN        | 7.35231   | 8.07009    | 25.881  | 26.7589 | 1.758012 |
| MIR10A      | 0         | 0          | 267.469 | 0       | 10.38623 |
| MIR22HG     | 0.471999  | 1.45645    | 3.38602 | 5.25103 | 2.053762 |
| MIR3648-1   | 87.9799   | 182.84     | 1926.5  | 2112.96 | 3.897763 |
| MIR5047     | 0         | 0          | 694.486 | 0       | 11.76215 |
| MIR635      | 0         | 0          | 863.338 | 0       | 12.07604 |
| MIR658      | 0         | 0          | 0       | 886.363 | 12.11401 |
| MIR663A     | 0         | 808.989    | 3135.88 | 8044.55 | 3.788381 |
| MIR663AHG   | 34.4904   | 35.4001    | 153.194 | 168.663 | 2.200025 |
| MIR663B     | 0         | 81.3144    | 178.038 | 222.379 | 2.297097 |
| MIR6753     | 0         | 0          | 16.6715 | 0       | 6.398444 |
| MIR7-3HG    | 0.3577    | 0          | 9.1177  | 8.85558 | 5.026186 |
| MMP10       | 0         | 0          | 5.39305 | 3.86959 | 5.564171 |
| MROH6       | 0.96876   | 0.646284   | 2.67563 | 3.86673 | 1.893249 |
| MT1F        | 3.17255   | 2.74198    | 37.2718 | 40.0717 | 3.664692 |
| MT1X        | 13.3321   | 8.45862    | 384.135 | 381.768 | 5.122572 |
| MT2A        | 28.5028   | 16.9005    | 646.321 | 655.966 | 4.835987 |
| MTRNR2L2    | 0.616644  | 0.287042   | 38.2811 | 43.8823 | 6.221602 |
| MTRNR2L8    | 0         | 0          | 20.7808 | 25.2139 | 7.851584 |
| MTRNR2L9    | 0.300449  | 0.694818   | 91.0363 | 98.5822 | 7.311144 |

|                     |            |             |          |         |          |
|---------------------|------------|-------------|----------|---------|----------|
| MUC5AC              | 0          | 0           | 3.04236  | 3.63886 | 5.104592 |
| NAT8L               | 10.8744    | 7.81379     | 30.9243  | 34.9687 | 1.807013 |
| NEFH                | 0.0300229  | 0.0701132   | 6.48396  | 7.17621 | 5.529184 |
| NRARP               | 9.61071    | 8.83116     | 28.0058  | 27.7999 | 1.587027 |
| NUDT4P2             | 0.00279547 | 0.0032949   | 5.77069  | 8.56514 | 6.140193 |
| OSGIN1              | 0.240978   | 0.702682    | 3.29346  | 3.24356 | 2.558452 |
| PARD6A              | 2.64388    | 1.02602     | 5.33629  | 7.13255 | 1.710916 |
| PCDH17              | 2.35052    | 0.96833     | 5.52536  | 5.1402  | 1.626587 |
| PHLDA2              | 1.28225    | 4.30779     | 22.7616  | 21.7699 | 2.949646 |
| PHOSPHO2-<br>KLHL23 | 0.918057   | 0.000334926 | 3.31689  | 6.05732 | 3.097728 |
| PLIN4               | 0.292865   | 0.523252    | 2.94607  | 3.05832 | 2.610223 |
| POU3F1              | 0.38642    | 0.496173    | 2.98738  | 3.57285 | 2.642581 |
| PRR35               | 0.468733   | 1.033       | 4.18973  | 3.60763 | 2.232519 |
| PRX                 | 1.22719    | 0.743316    | 4.50303  | 5.61766 | 2.249436 |
| PTOV1-AS2           | 7.56976    | 4.0054      | 18.7305  | 21.0778 | 1.764553 |
| PYCARD-AS1          | 0.808076   | 0.671891    | 4.80521  | 2.65171 | 2.188331 |
| RASD1               | 0.213024   | 0.315647    | 13.7022  | 14.8253 | 5.301021 |
| RFPL4A              | 0.289595   | 0.168374    | 11.5644  | 2.76513 | 4.464825 |
| RND1                | 1.855      | 1.41412     | 5.04316  | 5.48256 | 1.628433 |
| RNU11               | 715.96     | 1073.83     | 6796.88  | 6507.02 | 2.893847 |
| RPL13P5             | 2.595      | 0.54684     | 4.49005  | 6.26069 | 1.712314 |
| RPL36A-<br>HNRNPH2  | 0.00167956 | 0.00960572  | 9.58463  | 3.27892 | 5.950211 |
| RPS10-NUDT3         | 0.933663   | 0.763698    | 5.86422  | 3.84807 | 2.385224 |
| RRAD                | 0          | 0           | 35.0705  | 34.9794 | 8.456352 |
| RTEL1-<br>TNFRSF6B  | 2.51935    | 0.134882    | 2.59687  | 6.85674 | 1.757966 |
| SCRT1               | 0.0295316  | 0.103451    | 2.85587  | 3.30182 | 4.254984 |
| SERTAD1             | 5.67812    | 4.32823     | 36.3967  | 35.2114 | 2.81468  |
| SETD1B              | 5.18927    | 3.96963     | 14.5216  | 15.4221 | 1.687446 |
| SGK1                | 3.8867     | 2.83594     | 12.7872  | 9.35578 | 1.690427 |
| SLC30A1             | 8.25081    | 8.0092      | 31.7343  | 24.4129 | 1.775379 |
| SLC9A1              | 3.26229    | 2.33285     | 9.54388  | 10.6062 | 1.812119 |
| SNAI1               | 1.11102    | 1.13351     | 20.975   | 19.7461 | 4.065216 |
| SNORA36A            | 0          | 0           | 80.0375  | 0       | 8.648133 |
| SNORA51             | 0          | 0           | 59.3027  | 145.303 | 10.00004 |
| SNORA55             | 17.9321    | 0           | 45.9433  | 56.0408 | 2.494553 |
| SNORA56             | 0          | 0           | 5.48E-09 | 118.755 | 9.2162   |
| SNORA66             | 22.1525    | 0           | 0        | 206.484 | 3.208919 |
| SNORA77             | 0          | 0           | 88.955   | 0       | 8.800172 |
| SNORA80E            | 0          | 0           | 53.3779  | 195.817 | 10.28422 |
| SNORD83A            | 0          | 0           | 1222.27  | 0       | 12.57751 |
| SOCS1               | 0.306153   | 0.475403    | 2.94393  | 4.30233 | 2.923374 |
| SOCS3               | 0.373681   | 1.11461     | 2.80802  | 3.3583  | 1.914896 |
| SOX8                | 1.73977    | 2.37664     | 10.9713  | 13.8346 | 2.534365 |
| SPANXN3             | 0          | 0           | 5.65655  | 6.76002 | 5.979176 |

|         |          |           |         |         |          |
|---------|----------|-----------|---------|---------|----------|
| SPHK1   | 3.34424  | 4.0164    | 13.5252 | 15.0677 | 1.929133 |
| TFPI2   | 0.703145 | 1.81529   | 5.43245 | 3.97034 | 1.820677 |
| THBS1   | 0.105412 | 0.33427   | 5.92889 | 5.6964  | 4.208377 |
| TNFSF9  | 3.21058  | 5.32376   | 14.9002 | 14.5288 | 1.762239 |
| TOR4A   | 1.17502  | 1.2126    | 4.40505 | 5.26857 | 1.931953 |
| TRIM47  | 1.12058  | 1.1886    | 3.27832 | 4.31269 | 1.634594 |
| TUBB3   | 5.60263  | 3.40559   | 31.9553 | 29.7532 | 2.749143 |
| USB1    | 4.76495  | 4.26949   | 16.0762 | 19.5542 | 1.956088 |
| USP17L2 | 0        | 0.0873891 | 4.33417 | 7.19848 | 5.35138  |
| USP17L7 | 0        | 0         | 6.98283 | 4.03115 | 5.809155 |
| VASN    | 0.485187 | 0.7079    | 8.46447 | 6.69694 | 3.462953 |
| VGF     | 0.492027 | 0.626416  | 13.6815 | 15.329  | 4.46958  |
| ZFAND2A | 11.2566  | 8.83916   | 43.4285 | 35.1715 | 1.957017 |
| ZFP36   | 0.943823 | 1.80809   | 14.3004 | 11.9191 | 3.161881 |
| ZNF296  | 1.13001  | 1.14167   | 6.53326 | 10.7062 | 2.818791 |
| ZNF778  | 8.12134  | 7.96139   | 27.2739 | 35.7184 | 1.956406 |

Supplementary Table S2. HEK293-Treatment-Down-Regulated-Genes.

| Symbol      | FPKM (Control1) | FPKM (Control2) | FPKM (Treatment1) | FPKM (Treatment2) | Log2FC       |
|-------------|-----------------|-----------------|-------------------|-------------------|--------------|
| ABCG1       | 3.00545         | 7.91237         | 0.850696          | 1.32484           | -2.226548955 |
| ACTA2       | 7.2938          | 15.7981         | 2.78434           | 1.29067           | -2.44582863  |
| AGAP11      | 1.99924         | 5.2514          | 0.805183          | 1.23813           | -1.731733429 |
| ALDH1L2     | 13.1125         | 23.1896         | 5.45769           | 5.35621           | -1.728654051 |
| AMT         | 3.6503          | 8.02603         | 0.99094           | 0.689177          | -2.659194737 |
| AMY2B       | 2.77842         | 3.90209         | 1.49015           | 0                 | -2.025364214 |
| ARRDC3-AS1  | 3.19963         | 3.30723         | 0.735787          | 1.05596           | -1.751603085 |
| ASNS        | 179.335         | 409.171         | 100.612           | 86.5299           | -1.651873729 |
| ASS1        | 31.1922         | 100.984         | 12.0914           | 13.6987           | -2.348609673 |
| C6orf48     | 202.14          | 437.521         | 73.7694           | 69.4496           | -2.157522372 |
| CALCB       | 32.6244         | 125.154         | 15.0833           | 15.6609           | -2.351986386 |
| CD24        | 2.79232         | 6.78612         | 1.12253           | 1.79127           | -1.650928041 |
| CD70        | 4.60223         | 5.51901         | 1.37847           | 1.648             | -1.677587791 |
| CDC37L1-AS1 | 6.15765         | 12.3745         | 0                 | 4.94064           | -1.865496607 |
| CHAC1       | 33.9218         | 41.0631         | 11.4608           | 10.6109           | -1.755231259 |
| CNPY1       | 3.46068         | 5.90594         | 0.66485           | 1.59022           | -1.962245134 |
| COL14A1     | 6.04166         | 7.11728         | 1.69281           | 1.37159           | -2.032915785 |
| DDIT4       | 124.315         | 135.607         | 45.2847           | 39.3847           | -1.615872038 |
| DDR2        | 4.34238         | 13.9586         | 2.17894           | 2.0328            | -2.068182017 |
| DICER1-AS1  | 6.08107         | 5.88756         | 2.69314           | 0                 | -2.072458709 |
| DMC1        | 17.3212         | 34.3154         | 7.81834           | 8.58121           | -1.642826962 |
| EBF4        | 2.91614         | 7.76105         | 1.87867           | 1.19832           | -1.730862725 |
| EDA2R       | 5.18755         | 4.93213         | 0.84375           | 1.00913           | -2.329677032 |
| EDIL3       | 1.93638         | 5.05598         | 1.19767           | 0.901034          | -1.645644529 |

|              |          |         |            |            |              |
|--------------|----------|---------|------------|------------|--------------|
| ELSPBP1      | 1.92205  | 16.3581 | 0.76901    | 0.459727   | -3.69316419  |
| FGF21        | 1.94315  | 8.34151 | 0          | 0          | -5.712136268 |
| FLJ46906     | 12.7255  | 23.4805 | 2.87812    | 3.93266    | -2.376529369 |
| FUT1         | 2.35247  | 11.508  | 1.09565    | 1.00802    | -2.609638849 |
| G0S2         | 9.56516  | 52.8124 | 2.58434    | 5.1496     | -2.979536014 |
| GDAP1L1      | 0.775167 | 8.10129 | 0.138654   | 0.362985   | -3.693328405 |
| GDF15        | 3.8347   | 21.4837 | 0.664314   | 0          | -4.883838535 |
| GS1-259H13.2 | 1.68946  | 6.3337  | 1.45147    | 0          | -2.315942138 |
| H3F3A        | 5.43512  | 6.3259  | 0.00735355 | 0.00875294 | -5.790454214 |
| HES5         | 2.72446  | 6.56667 | 0.903953   | 1.0809     | -2.119043646 |
| HHIP         | 2.99047  | 6.21151 | 0.507282   | 1.09209    | -2.385471133 |
| HOXD4        | 11.374   | 5.52077 | 1.5199     | 3.63482    | -1.674671969 |
| HSPB8        | 3.14294  | 18.3986 | 2.24636    | 2.23868    | -2.214320863 |
| IFI27L2      | 12.2948  | 24.1987 | 4.54375    | 5.42839    | -1.850901299 |
| INHBE        | 5.12531  | 32.2093 | 0.302732   | 0.362051   | -5.43973952  |
| ITGA8        | 4.29958  | 3.51823 | 0.9165     | 1.21802    | -1.780082282 |
| JDP2         | 2.92422  | 4.79972 | 1.04688    | 0.870853   | -1.903697248 |
| KRTAP19-1    | 46.308   | 170.551 | 18.5518    | 18.4624    | -2.544162115 |
| LINC01021    | 6.61657  | 6.64004 | 0          | 0.436791   | -4.401351255 |
| LINC01411    | 2.11459  | 4.92265 | 0.752195   | 1.34904    | -1.653031297 |
| LINC01535    | 4.60417  | 6.33535 | 1.37663    | 0.928744   | -2.15258918  |
| LINC01604    | 13.0269  | 9.62793 | 3.40966    | 3.8669     | -1.612052551 |
| LOC105373383 | 5.02545  | 3.23078 | 0.882662   | 1.05477    | -1.984136094 |
| LRP1         | 7.0617   | 12.421  | 2.78033    | 2.9064     | -1.741389774 |
| MIR1291      | 1800.93  | 0       | 0          | 0          | -13.13661469 |
| MIR454       | 74.1865  | 0       | 0          | 0          | -8.538897008 |
| MIR503HG     | 8.15924  | 3.8315  | 1.10671    | 1.32297    | -2.212826546 |
| MIR554       | 0        | 549.06  | 0          | 0          | -11.42327352 |
| MIR7844      | 32.2596  | 0       | 0          | 0          | -7.342501411 |
| NCAM1        | 8.99398  | 14.0122 | 3.85513    | 3.45959    | -1.626717803 |
| NT5M         | 2.03115  | 4.20946 | 0.966531   | 0.866851   | -1.663316063 |
| NUDT4P1      | 4.48963  | 5.923   | 0.419937   | 0.459401   | -3.297563599 |
| NUP50-AS1    | 4.58769  | 5.6418  | 1.75861    | 1.05144    | -1.792809255 |
| NUPR1        | 11.5465  | 53.2439 | 2.4796     | 2.96432    | -3.525457184 |
| OSTN         | 4.63713  | 4.26544 | 0          | 1.72628    | -2.240456505 |
| PAUPAR       | 3.19705  | 3.05306 | 0.802292   | 0.799596   | -1.839814424 |
| PDCD4-AS1    | 2.8896   | 4.04481 | 0.743526   | 0.444591   | -2.361664954 |
| PLAC1        | 5.3609   | 20.8042 | 4.65032    | 2.56626    | -1.829803492 |
| PRH1-PRR4    | 3.94288  | 3.8494  | 2.45845    | 2.63E-09   | -1.588021793 |
| PRKAG2-AS1   | 3.61614  | 4.40082 | 0.548942   | 1.31242    | -1.995006862 |
| RAPGEF3      | 2.33703  | 12.1243 | 0.227267   | 0.809831   | -3.566984286 |
| RARB         | 9.47423  | 11.8227 | 2.91186    | 3.50197    | -1.700572773 |
| RIMS3        | 4.99435  | 14.3845 | 2.62946    | 3.31978    | -1.670816008 |
| RNVU1-20     | 6.36995  | 7.07449 | 0          | 0          | -6.092169374 |
| RTCA-AS1     | 3.6821   | 3.46184 | 1.71497    | 0          | -1.939232481 |
| S100P        | 9.46726  | 82.0577 | 0          | 2.37745    | -5.153298024 |

|          |          |         |          |          |              |
|----------|----------|---------|----------|----------|--------------|
| SCARNA1  | 58.1328  | 6.46082 | 15.7472  | 0        | -2.022548624 |
| SCARNA18 | 20.9778  | 0       | 0        | 0        | -6.726408916 |
| SCARNA21 | 34.1096  | 94.0724 | 0        | 0        | -9.326227226 |
| SCARNA3  | 0        | 28.479  | 0        | 0        | -7.16385091  |
| SCARNA8  | 0        | 27.2712 | 0        | 0        | -7.101776122 |
| SEPP1    | 13.6892  | 21.877  | 5.54941  | 3.85351  | -1.897051783 |
| SERPINF1 | 12.3666  | 22.6257 | 5.52954  | 4.20782  | -1.824325269 |
| SLC16A4  | 0.966833 | 5.86392 | 0.444314 | 0.209811 | -3.041160085 |
| SLC7A3   | 9.40735  | 31.3963 | 0.661833 | 3.16651  | -3.347493905 |
| SMIM14   | 2.58057  | 5.18163 | 0.690926 | 1.37706  | -1.811755376 |
| SNAR-D   | 54.3972  | 0       | 0        | 0        | -8.092683155 |
| SNORA14A | 0        | 23.1066 | 0        | 0        | -6.864594747 |
| SNORA18  | 281.034  | 128.875 | 0        | 72.6515  | -2.492976822 |
| SNORA25  | 117.097  | 25.775  | 0        | 0        | -9.482525641 |
| SNORA2B  | 0        | 19.7751 | 0        | 0        | -6.642058915 |
| SNORA30  | 55.7515  | 0       | 0        | 0        | -8.128032999 |
| SNORA31  | 26.2704  | 86.6709 | 0        | 0        | -9.143909938 |
| SNORA33  | 44.305   | 24.3903 | 0        | 0        | -8.428261756 |
| SNORA38  | 1381.75  | 850.574 | 237.211  | 145.303  | -2.544337103 |
| SNORA4   | 125.525  | 0       | 0        | 0        | -9.296055838 |
| SNORA41  | 0        | 25.775  | 0        | 0        | -7.020979939 |
| SNORA45B | 49.5769  | 0       | 0        | 0        | -7.959332575 |
| SNORA46  | 79.5511  | 0       | 0        | 0        | -8.639360608 |
| SNORA58  | 4.57408  | 1.72025 | 0        | 0        | -5.02110879  |
| SNORA5B  | 23.4195  | 25.775  | 0        | 0        | -7.948206599 |
| SNORA5C  | 17.9321  | 39.5502 | 0        | 0        | -8.171984881 |
| SNORA68  | 6579.29  | 4682.93 | 1349.61  | 1445.39  | -2.01049344  |
| SNORA71E | 18.8745  | 0       | 0        | 0        | -6.57550143  |
| SNORA75  | 35.8642  | 0       | 0        | 0        | -7.494423611 |
| SNORA79  | 30.9471  | 0       | 0        | 0        | -7.282954035 |
| SNORD12B | 225.026  | 0       | 0        | 0        | -10.13715767 |
| SNORD16  | 0        | 341.846 | 0        | 0        | -10.73997464 |
| SNORD22  | 839.112  | 368.617 | 0        | 206.148  | -2.549384298 |
| SNORD46  | 1961.4   | 2153.23 | 0        | 0        | -14.32854521 |
| SNORD60  | 3832.99  | 4264.22 | 0        | 0        | -15.30517291 |
| SNORD67  | 104.123  | 0       | 0        | 0        | -9.026841547 |
| SNORD97  | 3396.32  | 3098.17 | 1277.31  | 887.143  | -1.58512489  |
| SORCS1   | 2.28076  | 7.18794 | 0.605073 | 1.04786  | -2.38351121  |
| SUMO4    | 4.54554  | 2.87666 | 0.656908 | 0.785184 | -2.214672506 |
| TAS2R19  | 12.5817  | 9.41079 | 4.92803  | 1.96398  | -1.645805072 |
| TMEM255A | 3.174    | 5.58039 | 1.66477  | 0.883281 | -1.704186376 |
| TNC      | 4.51033  | 14.9829 | 2.20211  | 1.85351  | -2.210258517 |
| TNFRSF9  | 0.987818 | 6.56029 | 0.177059 | 0.211774 | -3.717913632 |
| TXNIP    | 19.4676  | 34.7134 | 5.30821  | 3.39572  | -2.610588525 |
| TYMSOS   | 4.12365  | 4.23969 | 1.01227  | 1.21014  | -1.821730541 |
| UBE2Q2L  | 4.58083  | 4.15778 | 0        | 2.46273  | -1.747144355 |

|         |         |         |         |         |              |
|---------|---------|---------|---------|---------|--------------|
| UNC5B   | 17.7357 | 22.6542 | 6.39352 | 5.99537 | -1.688969704 |
| VLDLR   | 6.20557 | 10.3472 | 1.92934 | 1.57881 | -2.17562815  |
| ZSCAN18 | 4.83397 | 15.6897 | 3.71332 | 2.90218 | -1.60438811  |
